# Supplementary material
Source: publisher site journal article supplement (https://www.spandidos-publications.com/1019/downloadSupplementary)

Figure S1. Receiver operating characteristic curve showing that there was no cut-off value for S100B in patients with and without brain metastases.

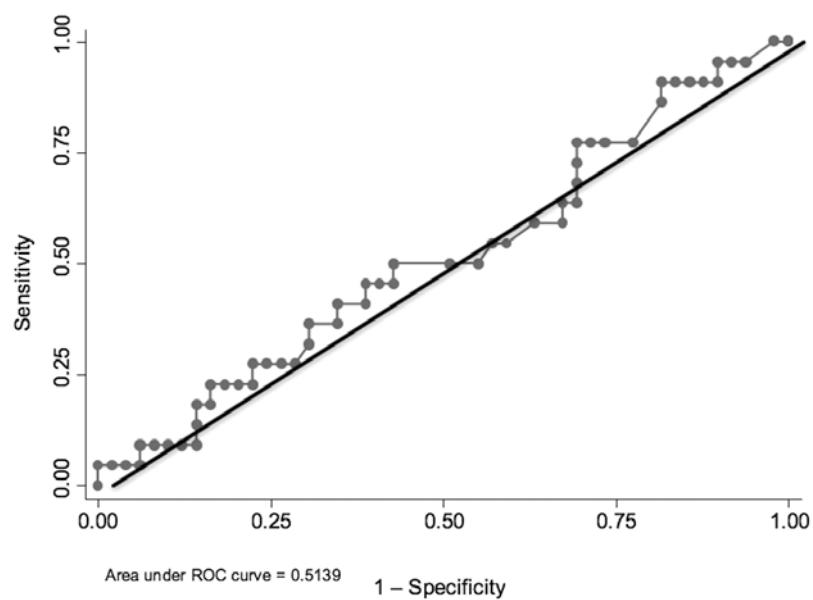

Supplement: Supplementary file 1 [file downloadSupplementary]
